# Supplementary material for: The prolactin receptor scaffolds Janus kinase 2 via co-structure formation with phosphoinositide-4,5-bisphosphate
Source: eLife journal article supplement (doi:10.7554/elife.84645), 2023-05-26
Supplement: fig5-data1 [file Dataanalysis EXP9.xlsx]

## Sheet: 1N
	1n	1n	1n	1n	1n	1n	1n	1n	1n	1n	1n	1n
	Mock	Mock + stim	WT	WT + stim	K4G	K4G + stim	K4E	K4E+stim	Phi4G	Phi4G + stim	3GAG	3GAG + stim
p150 1	5029.08	7665.45	4803.79	7438.03	6047.08	7554.74	6272.79	7237.91	5736.91	6453.23	6236.81	7414.98
P150 2	7366.23	5378.28	5930.08	5930.08	6139.86	5619.08	5882.28	6418.33	5640.5	5757.13	5482.84	5727.38
STAT5	11733.1	14750.3	11109.7	11713	8478.05	10631.3	9778.17	9613.71	9970.93	11067	10203.6	11854.6
Norm t. WT	1.05611	1.3277	1	1.05431	0.763125	0.956942	0.880151	0.865347	0.897501	0.99616	0.918445	1.06706
pSTAT5	4824.59	7179.71	2747.64	22169.8	1976.55	3425.45	1998.91	5293.47	1506.43	2709.62	1653.13	11733.4
Norm t. STAT5	4568.24	5407.61	2747.64	21027.9	2590.07	3579.58	2271.1	6117.16	1678.47	2720.06	1799.93	10996.1
Norm t. WT ustim	1.66261	1.96809	1	7.65308	0.942654	1.30278	0.826565	2.22633	0.610876	0.989963	0.655081	4.00201
Norm t. ustim	1	1.18374	1	7.65308	1	1.38204	1	2.69348	1	1.62056	1	6.10918
NORM only to WT		0.257164		1		0.17023		0.290907		0.129355		0.522928

## Sheet: 2N
	2n	2n	2n	2n	2n	2n	2n	2n	2n	2n	2n	2n
	Mock	Mock + stim	WT	WT + stim	K4G	K4G + stim	K4E	K4E+stim	Phi4G	Phi4G + stim	3GAG	3GAG + stim
p150 1	6963.08	7972.69	7483.4	8415.52	8283.35	7833.28	8150.57	7681.57	7161.15	7991.98	7477.62	6646.45
P150 2	6525.45	6890.08	6565.15	7155.57	6697.4	7029.86	6909.03	7284.28	6846.1	7672.4	6630.1	5153.08
STAT5	12273.4	10299	9890.15	11968.7	10817.3	10991.5	10704.3	8135.8	8853.97	9283.75	8252.56	7970.9
Norm t. WT	1.24098	1.04134	1	1.21016	1.09374	1.11136	1.08232	0.822617	0.895232	0.938687	0.834422	0.805944
pSTAT5	1627.96	1195.48	747.163	21838.9	956.82	918.82	103.364	1580.13	68.95	287.021	125.364	2270.45
Norm t. STAT5	1311.84	1148.02	747.163	18046.2	874.813	826.753	95.5019	1920.86	77.0192	305.769	150.24	2817.13
Norm t. WT ustim	1.75576	1.53651	1	24.153	1.17085	1.10652	0.127819	2.57087	0.103082	0.409239	0.201081	3.77043
Norm t. ustim	1	0.875123	1	24.153	1	0.945062	1	20.1133	1	3.97003	1	18.7508
		0.0636157		1		0.0458131		0.106441		0.0169436		0.156106

## Sheet: 3n
	3n	3n	3n	3n	3n	3n	3n	3n	3n	3n	3n	3n
	Mock	Mock + stim	WT	WT + stim	K4G	K4G + stim	K4E	K4E+stim	Phi4G	Phi4G + stim	3GAG	3GAG + stim
p150 1	2714.96	5852.08	5826.74	6810.62	5729.98	6050.74	6066.69	7072.69	7041.57	7122.81	8412.23	2356.6
P150 2	4118.77	6440.45	5592.57	6855.74	6041.2	6848.38	6038.03	4735.13	5818.38	6238.74	6178.38	2127.48
STAT5	9039.64	13373.9	10016.2	13790.8	9836.05	10932.1	9998.05	11275.5	12638.4	10309.4	9935.52	2248.96
Norm t. WT	0.902504	1.33523	1	1.37686	0.982017	1.09145	0.998191	1.12573	1.2618	1.02928	0.991947	0.224533
pSTAT5	508.163	2795.96	100	26471	100	457.335	100	1372.48	100	364.678	100	4016.79
Norm t. STAT5	563.059	2093.99	100	19225.7	101.831	419.017	100.181	1219.19	79.2518	354.305	100.812	17889.5
Norm t. WT ustim		20.9399	1	192.257	1.01831	4.19017	1.00181	12.1919	0.792518	3.54305	1.00812	178.895
Norm t. ustim		0.108916		1		0.0217947		0.0634149		0.0184288		0.930503

## Sheet: Summary
	Norm to unstim:								Norm to unstim:
	Mock + stim	WT + stim	K4G + stim	K4E+stim	Phi4G + stim	3GAG + stim			Mock	Mock + stim	WT	WT + stim	K4G	K4G + stim	K4E	K4E+stim	Phi4G	Phi4G + stim	3GAG	3GAG + stim
	1.18374	7.65308	1.38204	2.69348	1.62056	6.10918			1.66261	1.96809	1	7.65308	0.942654	1.30278	0.826565	2.22633	0.610876	0.989963	0.655081	4.00201
	0.875123	24.153	0.945062	20.1133	3.97003	18.7508			1.75576	1.53651	1	24.153	1.17085	1.10652	0.127819	2.57087	0.103082	0.409239	0.201081	3.77043
	3.71896	192.257	4.11482	12.1699	4.47062	177.455			5.63059	20.9399	1	192.257	1.01831	4.19017	1.00181	12.1919	0.792518	3.54305	1.00812	178.895
avg	1.92594	74.6876	2.14731	11.6589	3.35374	67.4382
sd	1.56045	102.151	1.71787	8.72116	1.5217	95.4865
sem	0.900924	58.9772	0.991811	5.03516	0.878554	55.1292
									1.18374	7.65308	1.38204	2.69348	1.62056	6.10918
									0.875123	24.153	0.945062	20.1133	3.97003	18.7508
									3.71896	192.257	4.11482	12.1699	4.47062	177.455
									0.154675	1	0.180586	0.351947	0.211753	0.798265
									0.0362325	1	0.0391282	0.832748	0.16437	0.776335
									0.0193437	1	0.0214027	0.0633001	0.0232534	0.92301
	Norm to WT only
	0.257164	1	0.17023	0.290907	0.129355	0.522928
	0.0636157	1	0.0458131	0.106441	0.0169436	0.156106
	0.108916	1	0.0217947	0.0634149	0.0184288	0.930503
