# Supplementary material for: The prolactin receptor scaffolds Janus kinase 2 via co-structure formation with phosphoinositide-4,5-bisphosphate
Source: eLife journal article supplement (doi:10.7554/elife.84645), 2023-05-26
Supplement: fig5-data2 [file Dataanalysis EXP12.xlsx]

## Sheet: 1N
	1n	1n	1n	1n	1n	1n	1n	1n	1n	1n	1n	1n
	Mock	Mock + stim	WT	WT + stim	K4E	K4E + stim	K2E 270	K2E 270+stim	K2E 280	K2E 280 + stim	3GAG	3GAG + stim
p150 1
P150 2
STAT5	8008.74	8357.4	7210.98	7884.64	6675.98	7071.4	6787.69	7081.1	6500.03	7264.23	6292.57	7291.69
Norm t. WT	1.11063	1.15898	1	1.09342	0.925808	0.980643	0.941299	0.981989	0.901407	1.00738	0.872637	1.01119
pSTAT5	1921.06	4104.38	761.527	15038.8	320.213	2253.06	254.385	8303.74	806.284	11225	346.799	4018.43
Norm t. STAT5	1729.7	3541.36	761.527	13753.9	345.874	2297.54	270.249	8456.04	894.472	11142.7	397.415	3973.95
Norm t. WT ustim	2.27136	4.65035	1	18.0609	0.454185	3.01701	0.354878	11.1041	1.17458	14.6321	0.521866	5.21839
Norm t. ustim	1	2.04738	1	18.0609	1	6.64269	1	31.2898	1	12.4573	1	9.99949
Only norm t. WT stim		0.257481		1		0.167046		0.614811		0.810152		0.288933

## Sheet: 2N
	2n	2n	2n	2n	2n	2n	2n	2n	2n	2n	2n	2n
	Mock	Mock + stim	WT	WT + stim	K4G	K4G + stim	K4E	K4E+stim	Phi4G	Phi4G + stim	3GAG	3GAG + stim
p150 1
P150 2
STAT5	6652.59	9631.78	9496.3	12240.1	10254.8	8591.71	8032.05	9144.95	7126.47	7659.95	6956.93	6894.12
Norm t. WT	0.700546	1.01427	1	1.28893	1.07988	0.904743	0.845809	0.963002	0.750447	0.806625	0.732594	0.72598
pSTAT5	3742.28	6209.28	1437.18	19463.2	1551.48	2214.01	681.113	8753.59	216.435	6898.76	100	1524.84
Norm t. STAT5	5341.94	6121.93	1437.18	15100.3	1436.72	2447.12	805.28	9089.9	288.408	8552.62	136.501	2100.39
Norm t. WT ustim	3.71695	4.25967	1	10.5068	0.999675	1.70272	0.560318	6.3248	0.200676	5.95096	0.0949782	1.46146
Norm t. ustim	1	1.14601	1	10.5068	1	1.70327	1	11.2879	1	29.6546	1	15.3873
Only norm t. WT		0.405419		1		0.162058		0.60197		0.566389		0.139096

## Sheet: 3n
	3n	3n	3n	3n	3n	3n	3n	3n	3n	3n	3n	3n
	Mock	Mock + stim	WT	WT + stim	K4G	K4G + stim	K4E	K4E+stim	Phi4G	Phi4G + stim	3GAG	3GAG + stim
p150 1
P150 2
STAT5	10675.1	10189	7173.47	11424.8	9540.54	9671.42	9703.05	10452.2	9228.05	9266.12	9071.3	9481.17
Norm t. WT	1.48814	1.42037	1	1.59264	1.32998	1.34822	1.35263	1.45707	1.28641	1.29172	1.26456	1.3217
pSTAT5
Norm t. STAT5	7891.47	7943.23	2821.62	16636.9	2380.26	3802.38	2067.13	9579.64	2526.96	13728.5	2297.13	4780.79
Norm t. WT ustim	2.79679	2.81513	1	5.89623	0.843578	1.34759	0.732606	3.39509	0.895572	4.86548	0.814119	1.69434
Norm t. ustim	1	1.00656	1	5.89623	1	1.59747	1	4.63426	1	5.43282	1	2.0812
Norm only to WT stim		0.477446		1		0.228551		0.575807		0.825186		0.287361

## Sheet: Summary
	Norm to unstim:								Norm to WT unstim
	Mock + stim	WT + stim	K4E + stim	K2E 270+stim	K2E 280 + stim	3GAG + stim			Mock	Mock + stim	WT	WT + stim	K4G	K4G + stim	K4E	K4E+stim	Phi4G	Phi4G + stim	3GAG	3GAG + stim
	2.04738	10.5068	6.64269	31.2898	12.4573	9.99949			1.66261	1.96809	1	7.65308	0.942654	1.30278	0.826565	2.22633	0.610876	0.989963	0.655081	4.00201
	1.14601	25.1671	1.70327	11.2879	29.6546	15.3873			1.75576	1.53651	1	24.153	1.17085	1.10652	0.127819	2.57087	0.103082	0.409239	0.201081	3.77043
	1.00656	5.89623	1.59747	4.63426	5.43282	2.0812			5.63059	20.9399	1	192.257	1.01831	4.19017	1.00181	12.1919	0.792518	3.54305	1.00812	178.895
avg	1.39998	13.8567	3.31448	15.7373	15.8482	9.15601
sd	0.564982	10.0627	2.88281	13.8736	12.4618	6.69305
sem	0.326193	5.8097	1.66439	8.00995	7.19484	3.86423
2.04738	10.5068	6.64269	31.2898	12.4573	9.99949
1.14601	25.1671	1.70327	11.2879	29.6546	15.3873
1.00656	5.89623	1.59747	4.63426	5.43282	2.0812
0.194862	1	0.632226	2.97805	1.18564	0.951713
0.0455361	1	0.0676785	0.448517	1.17831	0.611407
0.170712	1	0.27093	0.785971	0.921407	0.352971
Only norm to WT
0.257481	1	0.167046	0.614811	0.810152	0.288933
0.405419	1	0.162058	0.60197	0.566389	0.139096
0.477446	1	0.228551	0.575807	0.825186	0.287361
